# Supplementary material for: Prebiotically plausible mechanisms increase compositional diversity of nucleic acid sequences
Source: PubMed Central journal article supplement — Nucleic Acids Res. 2012 Feb 7;40(10):4711–22. doi: 10.1093/nar/gks065 (PMC3378899; doi:10.1093/nar/gks065), 2012-02-07
Supplement: supp_gks065_supplement_June.pdf [file supp_gks065_supplement_June.pdf]

# Prebiotically plausible mechanisms increase compositional diversity of nucleic acid sequences

## Supplementary Information

Julien Derr, Michael L. Manapat, Sudha Rajamani, Kevin Leu, Ramon Xulvi-Brunet,  
Isaac Joseph, Martin A. Nowak, Irene A. Chen

### Contents

|                                                                                       |           |
|---------------------------------------------------------------------------------------|-----------|
| <b>1. Compositional diversity and structure formation</b>                             | <b>2</b>  |
| <b>2. Biased composition restricts exploration of sequence space</b>                  | <b>4</b>  |
| <b>3. Parameters from experiments: <math>c_0, r_{lig}, r_{con}</math></b>             | <b>4</b>  |
| <b>4. Stochastic Model</b>                                                            | <b>8</b>  |
| <b>5. Mapping simulation parameters with experimentally determined rate constants</b> | <b>10</b> |
| <b>6. Deterministic Model</b>                                                         | <b>10</b> |
| <b>7. Size distribution</b>                                                           | <b>13</b> |
| 7.1. Without template-directed ligation, assuming $a = b$ . . . . .                   | 13        |
| 7.2. Without template-directed ligation, assuming $a \neq b$ . . . . .                | 14        |
| 7.3. Average length without template-directed ligation . . . . .                      | 14        |
| 7.4. Size distribution with template-directed ligation . . . . .                      | 15        |
| <b>8. Biased monomer abundance</b>                                                    | <b>15</b> |
| <b>9. Concatenation increases compositional diversity: a mass-action effect</b>       | <b>17</b> |
| <b>10. Compositional diversity and biased reactivity</b>                              | <b>19</b> |
| <b>11. Template-directed ligation counters intrinsic bias</b>                         | <b>22</b> |
| <b>12. Stochastic simulation using a 4-letter alphabet</b>                            | <b>22</b> |
| <b>13. Why high <math>C_k</math> templates are favored</b>                            | <b>23</b> |

|                                                                                                                                      |           |
|--------------------------------------------------------------------------------------------------------------------------------------|-----------|
| <b>14. Cumulative frequency distribution of <math>C_k</math> for substrates and products of template-directed ligation (4 bases)</b> | <b>23</b> |
| <b>15. Search for ribozyme elements in the products of experimental template-directed ligation</b>                                   | <b>25</b> |
| <b>16. Sampling error of sequencing (4 bases)</b>                                                                                    | <b>27</b> |
| <b>17. Methods for experiments with binary templates</b>                                                                             | <b>27</b> |
| <b>18. Measurement of <math>k_{\text{con}}</math>, <math>k_{\text{lig}}</math>, and <math>k_h</math> in a DNA analog</b>             | <b>29</b> |
| <b>19. Template <math>C_k</math> and ligation yield</b>                                                                              | <b>29</b> |
| <b>20. Diversity of the pool</b>                                                                                                     | <b>29</b> |
| <b>21. Folding energy and compositional diversity</b>                                                                                | <b>31</b> |
| <b>22. Ribozymes analyzed for main text Figure 1b</b>                                                                                | <b>32</b> |
| <b>23. Compositional diversity and folding energy: principal components regression</b>                                               | <b>34</b> |
| <b>24. References</b>                                                                                                                | <b>34</b> |

## 1. Compositional diversity and structure formation

We develop a simple model to illustrate why compositional diversity is correlated with formation of secondary structure. Let us compute the probability of forming a hairpin in a sequence of length  $L = 50$ , for annealing length  $k = 4$ . Given  $H_4$  of the sequence, we calculate the probability of finding one subsequence of length  $k$  in the 3' half of the sequence which is complementary to any subsequence of the 5' half.

Let  $\Omega_1$  and  $\Omega_2$  be the number of different  $k$ -length subsequences in the 3' and 5' halves of the sequence, respectively. The probability of forming a hairpin is:

$$p_{\text{hairpin}} = 1 - \bar{p}_{\text{hairpin}} \quad (1)$$

in which

$$\bar{p}_{\text{hairpin}} = \prod_{i=1}^{\Omega_1} p_i \quad (2)$$

where  $i$  explores all the different subsequences of the 5' half, and  $p_i$  is the probability of not finding the complement of subsequence  $i$  on the 3' half. If  $N = 4$  is the number of possible bases:

$$p_i = \prod_{j=1}^{\Omega_2} \left(1 - \frac{1}{N^k}\right) \quad (3)$$

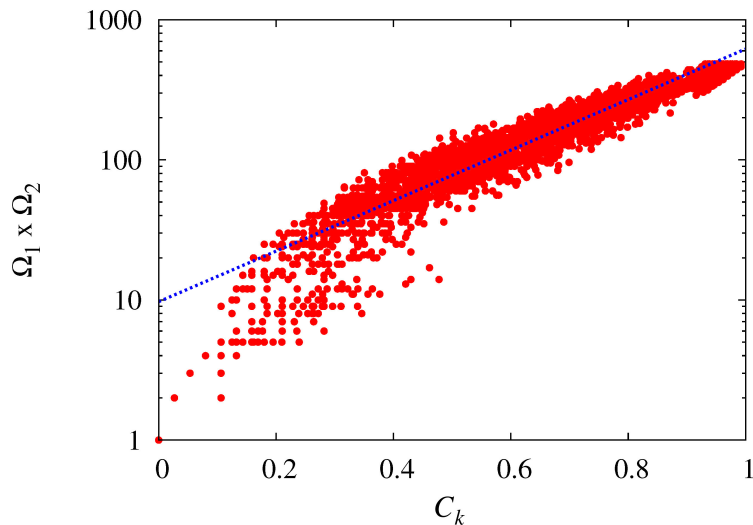

Supplementary Figure 1: Exponential relationship between  $\Omega_1 \times \Omega_2$  and  $C_k$ , with  $k = 4$ . The dashed line shows a linear fit:  $\log(\Omega_1 \times \Omega_2) = aC_k + b$ , where  $a \approx 4.2$ ,  $b \approx 2.3$ .

Therefore,

$$\bar{p}_{hairpin} = \left(1 - \frac{1}{N^k}\right)^{\Omega_1 \times \Omega_2} \quad (4)$$

$\Omega$  can be roughly linked to the normalized compositional diversity by the formula:  $C_k = \log_2(\Omega)$ . We verified this relationship numerically (Supplementary Figure 1), so  $\log(\Omega_1 \times \Omega_2) = aC_k + b$ . In terms of compositional diversity:

$$p_{hairpin} = 1 - \left(1 - \frac{1}{N^k}\right)^{e^{aC_k + b}} \quad (5)$$

Supplementary Figure 2 displays this equation graphically.

To the extent that more complicated secondary structures comprise multiple stem substructures, this reasoning would also apply. For example, the formation of a hammerhead is analogous to the formation of three hairpins with a particular set of length constraints (manifest in  $\Omega$ ). The precise calculation would vary depending on the values of  $\Omega$  and whether the structure contains mismatched regions. Our simple hairpin model is meant to demonstrate the statistical reason why  $C_k$  is correlated with calculated minimum folding energy, but there is substantial variation from other factors (39%). The fact that many secondary structures are considered together in this correlation probably contributes to the additional variation.

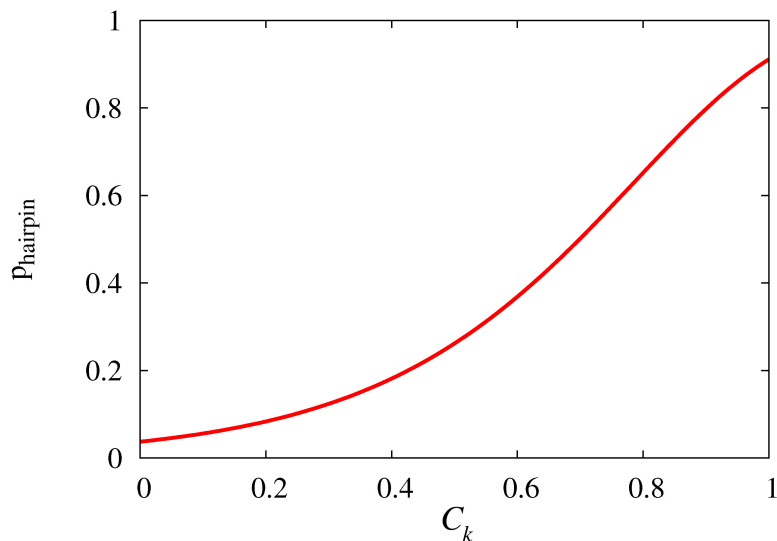

Supplementary Figure 2: Probability  $p_{\text{hairpin}}$  of forming a hairpin versus  $C_k$ , following equation 5.

## 2. Biased composition restricts exploration of sequence space

We performed computer simulations to determine the influence that a typical bias has on the distribution of  $C_k$ . Each sequence was generated by randomly assigning a monomer value (0 or 1) to each position according to a Bernoulli process. In the unbiased case, each value has an equal probability of being chosen ( $p = 1 - p = 0.5$ ). For the biased case, the probability of incorporation of a 0 was  $p = 0.9$  and the probability of incorporation of a 1 was  $1 - p = 0.1$ . (This corresponds to a 9-fold bias in monomer abundance.)  $C_k$  was measured with  $k = 4$ . The results are shown in Supplementary Figure 3. The bias moves the distribution from  $\langle C_k \rangle \approx 0.94$  to  $\langle C_k \rangle \approx 0.43$ . The drop is substantial, showing that achieving high compositional diversity in a biased environment is not trivial.

## 3. Parameters from experiments: $c_0, r_{\text{lig}}, r_{\text{con}}$

Our choice of parameter ranges was determined by searching the experimental literature and by our own work. The concentration of monomers ( $c_0$ ) is an important parameter since it relates rate constants to the rate of reaction in the simulations. Typical values of the concentration used in experiments are:

- 20 mM nucleotides (template-directed polymerization from monomers [79])
- 100 mM nucleotides (template-directed polymerization from monomers [77])
- 25-50 mM nucleotide equivalents (template-directed ligation of hexamers to form dodecamers [84])

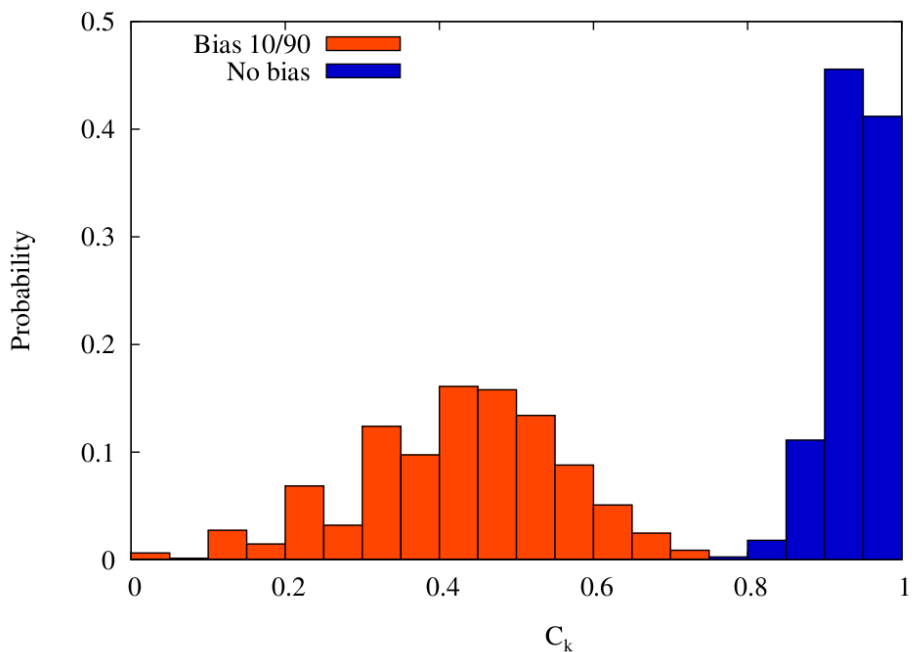

Supplementary Figure 3: Probability of generating a sequence of length 50 with a given  $C_4$  in the biased case (red) and the unbiased case (blue).

- 50 mM monomers, 50 mM template (template-directed polymerization from monomers [52])
- 66 mM nucleotide equivalents (template-directed ligation from trimers to form hexamers [85])
- few mM nucleotide equivalents (template-directed ligation from random hexamers or dodecamers [34])
- 15 mM nucleotides (non-templated polymerization of monomers [21])

Therefore, we consider  $c_0$  to be 0.01-0.1 M.

In general,  $r_{\text{lig}}$  depends on the activation chemistry and the rate of annealing [75] (Supplementary Table 1). The backbone conformation (A form vs. B form) appears to be less important in determining the rate of template-directed ligation, as shown by our comparison of an RNA template vs. DNA template (Supplementary Figure 4). Taking these different experimental systems into account, the relative strength of ligation to concatenation ( $r_{\text{lig}}$ ) is on the order of  $10^3$  to  $10^7$ .

The backbone strongly influences the rate of hydrolysis ( $r_{\text{con}}$ ), so for our modeling we focus on the range of parameters appropriate to RNA. Although  $r_{\text{con}}$  has not been

| Reactants                                                                 | $k_{\text{con}}$                          | $k_{\text{lig}}$                                        | $k_h$                                   | Reference               |
|---------------------------------------------------------------------------|-------------------------------------------|---------------------------------------------------------|-----------------------------------------|-------------------------|
| 2-MeImpG ( $\sim 100$ mM nucleotide equivalents)                          | $0.09 \text{ M}^{-1} \text{ h}^{-1}$      | $430 \text{ M}^{-2} \text{ h}^{-1}$                     |                                         | [52]                    |
| DNA trimers (carbodiimide activation; $\sim 4$ mM nucleotide equivalents) | $0.02 \text{ M}^{-1} \text{ s}^{-1}$      | $1700 \text{ M}^{-2} \text{ s}^{-1}$                    |                                         | [54]                    |
| Oligoribonucleotides (triphosphate)                                       |                                           | $1.3 \times 10^5 \text{ M}^{-2} \text{ h}^{-1}$         | $6 \times 10^{-3} \text{ h}^{-1}$       | [82]                    |
| ImpdG, DNA template ( $\geq 10$ mM nucleotide equivalents)                | $3 \pm 0.8 \text{ M}^{-1} \text{ h}^{-1}$ | $3 \pm 0.3 \times 10^8 \text{ M}^{-2} \text{ h}^{-1}$   | $2 \pm 1 \times 10^{-5} \text{ h}^{-1}$ | This work, Supp. Fig. 4 |
| ImpN, RNA template (10-40 mM nucleotide equivalents)                      |                                           | $3 \times 10^7$ to $10^9 \text{ M}^{-2} \text{ h}^{-1}$ |                                         | This work               |

1: Rate constants for concatenation, template-directed ligation, and hydrolysis.

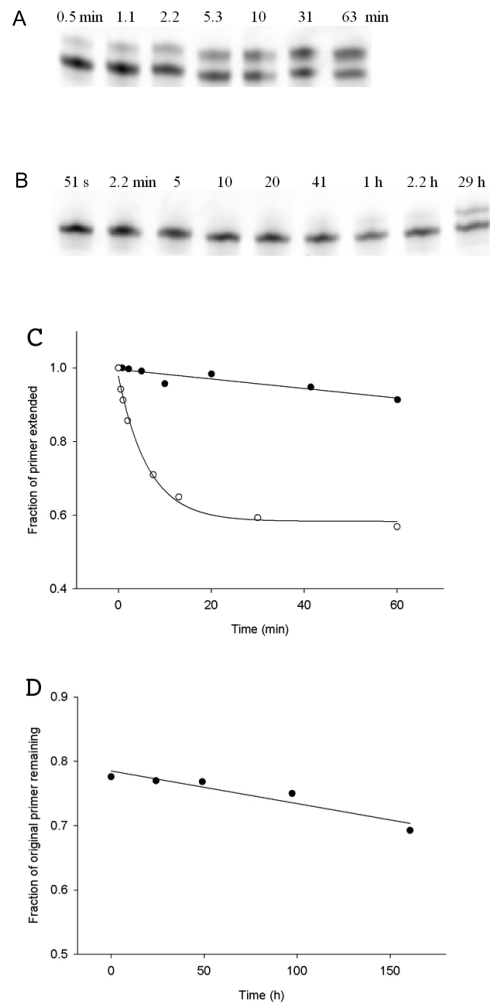

Supplementary Figure 4: The constants  $k_{\text{con}}$ ,  $k_{\text{lig}}$ , and  $k_h$  in a DNA analog. Polyacrylamide gel of the (a) templated reaction or (b) non-templated reaction over time. (c) Primer extension over time for templated (open circles) or non-templated (closed circles) reactions. (d) Primer degradation over time.

measured in a single system, we can infer it from the following:  $r_{\text{con}} = k_{\text{con}}c_0/k_{\text{h}} = (k_{\text{con}}/k_{\text{lig}})c_0^*(k_{\text{lig}}/k_{\text{h}})$ , where  $k_{\text{con}}/k_{\text{lig}}$  and  $k_{\text{lig}}/k_{\text{h}}$  have been measured in RNA systems (Supplementary Table 1, first three lines). Therefore, we consider  $r_{\text{con}}$  to be on the order of 1 to 100. For our first approximation, we did not consider the effects of secondary structure. We also did not consider product inhibition, since this is less important for a promiscuous system [76, 78] and can be circumvented by spatial organization [80].

## 4. Stochastic Model

We begin with a collection of  $N_I$  monomers,  $N_0$  of which are 0's and  $N_1$  of which are 1's. The total number of monomers in the system,  $N_I$ , controls the volume of our model reactor. Thus,  $N_0/N_I$  and  $N_1/N_I$  are proportional to the initial concentrations of 0 and 1, respectively.

At any given time, the system consists of a variable number  $n$  of molecules (monomers and polymers), which we will denote by  $P_1, \dots, P_n$ . At time 0,  $P_1, \dots, P_{N_0}$  are all equal to the monomer 0, and  $P_{N_0+1}, \dots, P_{N_I}$  are all equal to the monomer 1.

When the 5' monomer of a molecule is a 0, concatenation occurs with rate  $a$ . When the 5' site is a 1, concatenation occurs with rate  $b$ . Hydrolysis occurs with rate  $h$  (per bond, i.e., longer polymers have a greater chance of being hydrolyzed at some point along the chain). Template-directed ligation occurs with rate  $c$ .

Simulations of the system were based on the Gillespie algorithm. In each iteration, an exponential waiting time with parameter  $\lambda$  is generated, where  $\lambda$  is the sum of the rates of all the possible reactions. A particular reaction is then chosen to occur at random based on its rate relative to the other possible reactions. Suppose there are  $n$  polymers in the system at a given time. For a given polymer  $P_i$ , three reactions are possible (Supplementary Figure 5):

**Hydrolysis** of one of its bonds, each bond having an equal probability  $h$  of being hydrolyzed. If hydrolysis occurs, two fragments result. The first fragment remains labelled  $P_i$ , while the second fragment becomes the new polymer  $P_{n+1}$ .

**Concatenation** with another polymer, with rate  $a/N_I$  if the 5' site of  $P_j$  is a 0 and rate  $b/N_I$  if the 5' site of  $P_j$  is a 1. If concatenation occurs between  $P_i$  and  $P_j$ , the new polymer is labelled  $P_i$ ,  $P_k$  is replaced by  $P_{k+1}$  for  $k = j, \dots, n-1$ , and  $P_n$  is removed.

**Template-directed ligation** of two polymers, with rate  $c/N_I^2 \times n_p$ , where  $n_p$  is the number of potential ligation sites on the template, which depends on the complementarity between the template and the other available molecules in the pool. The extent of complementarity required in these simulations is three consecutive bases at the 5' fragment, and three consecutive bases at the 3' fragment. If ligation happens using the template  $P_r$  and the two fragments  $P_s$  and  $P_t$ ,  $P_s$  is extended to  $P_s + P_t$ ,  $P_m$  is replaced with  $P_{m+1}$  for  $m = t, \dots, n-1$ , and  $P_n$  is removed. The



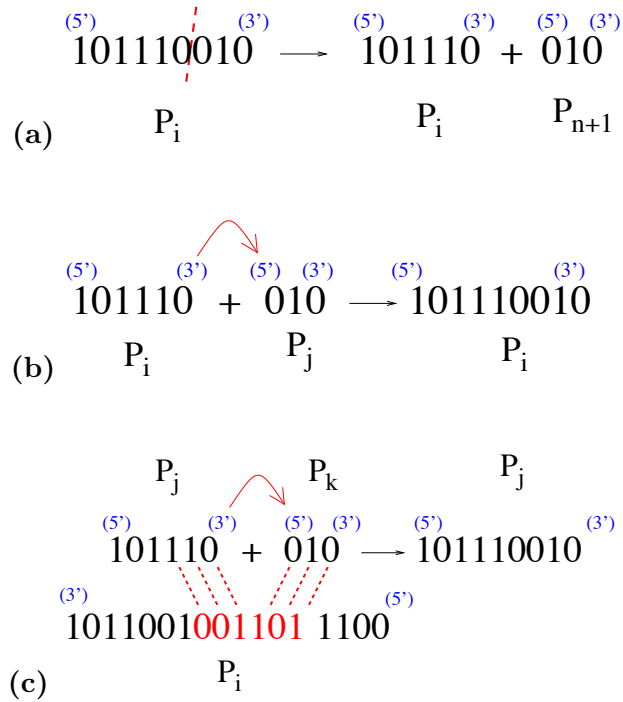

Supplementary Figure 5: Schematic representation of the basic reactions of the model. **(a)** Hydrolysis. **(b)** Concatenation. **(c)** Template-directed ligation.

polymer  $P_i$  can participate in the ligation reaction either as a template or as one of the fragments that are joined.

To ensure that the reaction rates depend only on monomer concentration and not on the absolute number of monomers in the system, the rate constants in the model are normalized by  $N_I$ . The normalization is linear in  $N_I$  for concatenation but quadratic for template-directed ligation. This is described in the following section (Mapping simulation parameters with experimentally determined rate constants).

After each reaction, we measure various observables  $X$  of interest (e.g., the complexity). If we denote the exponential waiting time before the reaction by  $\delta t$ , this measurement makes a contribution of weight  $\delta t$  to the long-term average of  $X$ . To check when equilibrium has been reached, we measure the observables at successive, exponentially distributed time steps (times 0 and 1, then 1 and 2, then 2 and 4, etc). Steady-state is determined to have been reached when  $(X_{t+1} - X_t)/X_{t+1}$  is less than a fixed tolerance (typically 0.1%).

## 5. Mapping simulation parameters with experimentally determined rate constants

We describe the link between the measured reaction rates ( $k_{\text{lig}}$ ,  $k_{\text{con}}$ ,  $k_{\text{h}}$ ) and the computational parameters ( $a$ ,  $b$ ,  $c$ , and  $h$ ).

**Concatenation:** We have the chemical reaction

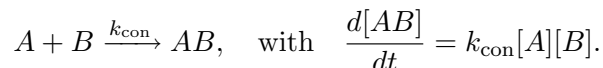

Let  $n$  be the number of polymers in the system,  $V$  the volume of the reactor,  $V_0$  the average volume per monomer ( $V_0 = 1/c_0$ , where  $c_0$  is the initial concentration of monomers), and  $N_I$  the total number of monomers. We can compare the individual rates in both the real and simulated systems:

$$k_{\text{con}} \times \frac{n}{V} = \frac{B}{N_I} n = \frac{B}{V/V_0} n.$$

where  $B$  represents either  $a$  or  $b$ . The first expression corresponds to the real system and the second and third to the simulation. Therefore,

$$B = \frac{k_{\text{con}}}{V_0}.$$

**Template-directed ligation:** The same reasoning applies for the equation

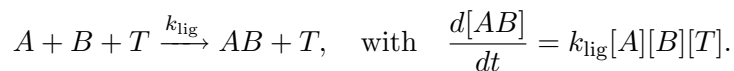

We conclude that

$$c = \frac{k_{\text{lig}}}{V_0^2}.$$

**Hydrolysis:** This is a first-order reaction, so it is not affected by  $c_0$  (i.e.,  $h = k_{\text{h}}$ ).

## 6. Deterministic Model

The deterministic model is the natural analogue of the stochastic one. As before, let  $a$  be the concatenation rate

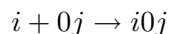

and  $b$  the concatenation rate

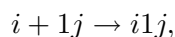

where  $i$  and  $j$  are any sequences (possibly null). Let  $h$  be the rate at which any given bond in a polymer is hydrolyzed.

We first formulate the system without ligation, so concatenation and hydrolysis are the only permissible processes. Let  $x_i$  denote the abundance of sequence  $i$ . We will now determine  $\dot{x}_i$ , the time derivative of the abundance.

Let  $P_i$  denote collection of all sequences that have  $i$  as a prefix and  $S_i$  the collection of all sequences that have  $i$  as a suffix. Then we recover  $i$  from hydrolysis of longer sequences at rate

$$h \left( \sum_{j \in P_i} x_j + \sum_{k \in S_k} x_k \right).$$

Let  $l$  be the length of  $i$ . There are  $l - 1$  bonds in sequence  $i$ , so  $i$  is lost due to hydrolysis at rate

$$h(l - 1)x_i.$$

The total contribution to  $\dot{x}_i$  due to hydrolysis is thus

$$h \left( \sum_{j \in P_i} x_j + \sum_{k \in S_k} x_k \right) - h(l - 1)x_i.$$

Let  $R_{i,0}$  denote the collection of all suffixes of  $i$  with leading bit 0, and for  $m \in R_{i,0}$ , let  $L_i(m)$  be the prefix of  $i$  such that the concatenation of  $L_i(m)$  and  $m$  (in that order) is  $i$ . Similarly, let  $R_{i,1}$  denote the collection of all suffixes of  $i$  with leading bit 1, and for  $n \in R_{i,1}$ , let  $L_i(n)$  be the prefix of  $i$  such that the concatenation of  $L_i(n)$  and  $n$  (in that order) is  $i$ . Then  $i$  is formed by the concatenation of shorter sequences at rate

$$a \sum_{m \in R_{i,0}} x_{L_i(m)} x_m + b \sum_{n \in R_{i,1}} x_{L_i(n)} x_n.$$

Now let  $Z$  denote the collection of all sequence with leading bit 0,  $O$  the collection of all sequence with leading bit 1, and  $A$  the collection of all sequences. If the leading bit of  $i$  is 0, let  $d = a$ . Otherwise, let  $d = b$ . Then  $i$  is lost due to concatenation at rate

$$ax_i \sum_{p \in Z} x_p + bx_i \sum_{q \in O} x_q + dx_i \sum_{r \in A} x_r.$$

The total contribution to  $\dot{x}_i$  due to concatenation is thus

$$a \sum_{m \in R_{i,0}} x_{L_i(m)} x_m + b \sum_{n \in R_{i,1}} x_{L_i(n)} x_n - ax_i \sum_{p \in Z} x_p - bx_i \sum_{q \in O} x_q - dx_i \sum_{r \in A} x_r.$$

When only hydrolysis and concatenation are possible, we therefore have

$$\begin{aligned} \dot{x}_i = & h \left( \sum_{j \in P_i} x_j + \sum_{k \in S_k} x_k \right) - h(l - 1)x_i \\ & + a \sum_{m \in R_{i,0}} x_{L_i(m)} x_m + b \sum_{n \in R_{i,1}} x_{L_i(n)} x_n \\ & - ax_i \sum_{p \in Z} x_p - bx_i \sum_{q \in O} x_q - dx_i \sum_{r \in A} x_r. \end{aligned}$$

For the simulation to be computationally tractable, we must impose an arbitrary limit on sequence length, i.e., we do not allow there to be sequences longer than  $N$ . We can make the system above reflect this by (1) omitting sequences longer than  $N$  from all the collections and (2) omitting sequences longer than  $n - l$  from the collections  $Z$ ,  $O$ , and  $A$  (so those collections become dependent on  $i$ ).

Now we add template-directed ligation to the system. Let  $c$  be the ligation rate. For each sequence  $i$ , let  $F_i$  denote the collection of triples  $(u, v, w)$  such that sequence  $u$  (the template) catalyzes the ligation of  $v$  and  $w$  to form  $i$ . (While the annealing length is not explicitly included in the formulation of the system, it determines which triples can be in  $F_i$  and is thus implicitly one of the parameters.) Then  $i$  is formed by ligation at rate

$$c \sum_{(u,v,w) \in F_i} x_u x_v x_w.$$

Let  $R_i$  denote the collection of all triples of the form  $(y, i, z)$  or  $(y, z, i)$ , i.e., a triple in which  $i$  is one of the ligation reactants (but not the template). Then  $i$  is lost due to ligation at rate

$$c \sum_{(y,z,\alpha) \in R_i} x_y x_z x_\alpha,$$

where at least one of  $z$  and  $\alpha$  is equal to  $i$ . When  $i$  acts as a template, its abundance does not change and thus there is no need to include its role as a template in the formulation of  $\dot{x}_i$ . The total contribution ligation makes to  $\dot{x}_i$  is hence

$$c \sum_{(u,v,w) \in F_i} x_u x_v x_w - c \sum_{(y,z,\alpha) \in R_i} x_y x_z x_\alpha.$$

As before, these terms will be adjusted in practice to reflect the length limitation.

With hydrolysis, concatenation, and ligation, the full system is as follows:

$$\begin{aligned} \text{time derivative of } i\text{'s abundance } \dot{x}_i = & \\ \text{formation by hydrolysis} & \left\{ h \left( \sum_{j \in P_i} x_j + \sum_{k \in S_k} x_k \right) \right. \\ \text{loss due to hydrolysis} & \left\{ -h(l-1)x_i \right. \\ \text{formation by concatenation} & \left\{ +a \sum_{m \in R_{i,0}} x_{L_i(m)} x_m + b \sum_{n \in R_{i,1}} x_{L_i(n)} x_n \right. \\ \text{loss due to concatenation} & \left\{ -ax_i \sum_{p \in Z} x_p - bx_i \sum_{q \in O} x_q - dx_i \sum_{r \in A} x_r \right. \\ \text{formation by ligation} & \left\{ +c \sum_{(u,v,w) \in F_i} x_u x_v x_w \right. \\ \text{loss due to ligation} & \left\{ -c \sum_{(y,z,\alpha) \in R_i} x_y x_z x_\alpha. \right. \end{aligned} \quad (6)$$

We simulate this system until equilibrium has been reached and then compute the desired functions of the equilibrium distribution (average  $C_k$ , diversity, and length).

## 7. Size distribution

### 7.1. Without template-directed ligation, assuming $a = b$

We want to compute  $p(l)$ , the probability that a polymer randomly selected from the reactor has length  $l$ . In this simple case, we just have two parameters:  $B$  is the effective concatenation rate (see below) and  $h$  is the hydrolysis rate.

There are two ways of consuming a polymer of size  $l$ : concatenation (with rate  $p(l)B$ ) or hydrolysis (with rate  $(l-1)hp(l)$ ). There are also two ways of creating a polymer of size  $l$ : concatenation of smaller fragments (with rate  $1/2 \sum_{i=1}^{l-1} Bp(i)p(l-i)$ ) or hydrolysis of bigger fragments (with rate  $2 \sum_{i=l+1}^{\infty} hp(i)$ ). At steady-state the detailed balance equation

$$Bp(l) + (l-1)hp(l) = 1/2 \sum_{i=1}^{l-1} Bp(i)p(l-i) + 2 \sum_{i=l+1}^{\infty} hp(i). \quad (7)$$

should hold. If we rewrite the same detailed balance equation for polymers of length  $l+1$  and then subtract the two equations, we obtain

$$\begin{aligned} [p(l+1) - p(l)](lh + B) + hp(l) &= \frac{B}{2} \sum_{i=1}^{l-1} p(i)[p(l+1-i) - p(l-i)] \\ &+ \frac{B}{2} p(l)p(1) - 2hp(l+1). \end{aligned} \quad (8)$$

Based on our simulations, we guess an exponential solution of the form  $p(l) = \alpha e^{\beta l}$ , and we obtain

$$\alpha = \frac{2h}{B}, \quad (9)$$

$$\beta = -\log\left(1 + \frac{2h}{B}\right). \quad (10)$$

We can verify that this solution is properly normalized, i.e., that  $S = 1$ , where  $S$  is the sum of all probabilities:

$$S = \sum_{i=1}^{\infty} p(i) = \sum_{i=0}^{\infty} \alpha e^{\beta i} - \alpha = \alpha \frac{1}{1 - \frac{1}{1+\alpha}} - \alpha = 1. \quad (11)$$

The effective rate  $B$  reflects the average concentration of polymers in the pool.  $B$  is related to the absolute concatenation rate  $B_0 = bh$  by the equation

$$B = B_0 \frac{\langle n \rangle}{n_0}, \quad (12)$$

where  $\langle n \rangle$  is the average number of polymers at steady-state and  $n_0$  is the initial number of monomers. The average length of a polymer at steady-state is thus  $\langle l \rangle = n_0 / \langle n \rangle$ . We

can write  $\langle l \rangle$  as a function of an infinite sum depending on  $\alpha$  and  $\beta$  and express  $B$  accordingly:

$$B = B_0 \frac{1}{\alpha \sum_{i=1}^{\infty} i e^{\beta i}} = \frac{B_0(1 - e^{\beta})^2}{\alpha e^{\beta}}. \quad (13)$$

We then rewrite equations (9) and (10) to obtain:

$$\begin{aligned} \alpha &= \frac{1}{X} - 1, \\ \beta &= \log(X). \end{aligned}$$

where  $X$  is the solution of  $X^2 - X(2 + 2h/B_0) + 1 = 0$ , with  $X < 1$ .

## 7.2. Without template-directed ligation, assuming $a \neq b$

The bias  $a \neq b$  does not change the exponential shape of the distribution, but it does change the effective concatenation rate:  $2aB$  is the concatenation rate for zeros, and  $2bB = 2(1 - a)B$  is the concatenation rate for ones. We can write the dynamics of the average population of zeros and ones ( $n_0$  and  $n_1$ ), assuming that hydrolysis gives as many reactive zeros as reactive ones (the term  $\xi(n_0, n_1)$ ). The validity of this assumption is checked by the consistency of this analysis with the simulations (see below). The dynamics are:

$$\dot{n}_0 = -\frac{1}{2}2aBn_0 + \xi(n_0, n_1), \quad (14)$$

$$\dot{n}_1 = -\frac{1}{2}2(1 - a)Bn_1 + \xi(n_0, n_1), \quad (15)$$

which give the steady state equilibrium

$$\frac{n_0}{n_1} = \frac{1 - a}{a}. \quad (16)$$

We can relate this to the previous section by computing the effective concatenation rate

$$B_{\text{eff}} = 2B \frac{n_0 a + n_1 (1 - a)}{n_0 + n_1}, \quad (17)$$

which is equivalent to

$$B_{\text{eff}} = 4Ba(1 - a). \quad (18)$$

## 7.3. Average length without template-directed ligation

We can compute the average length, which we find to be  $\frac{1}{1-X}$ , or

$$\langle l \rangle = \frac{d}{\sqrt{1 + 2d} - 1}, \quad (19)$$

where  $d = 4a(1 - a)B_0/h$ . This analytical calculation agrees very well with the results of the simulation (see Figure 6).

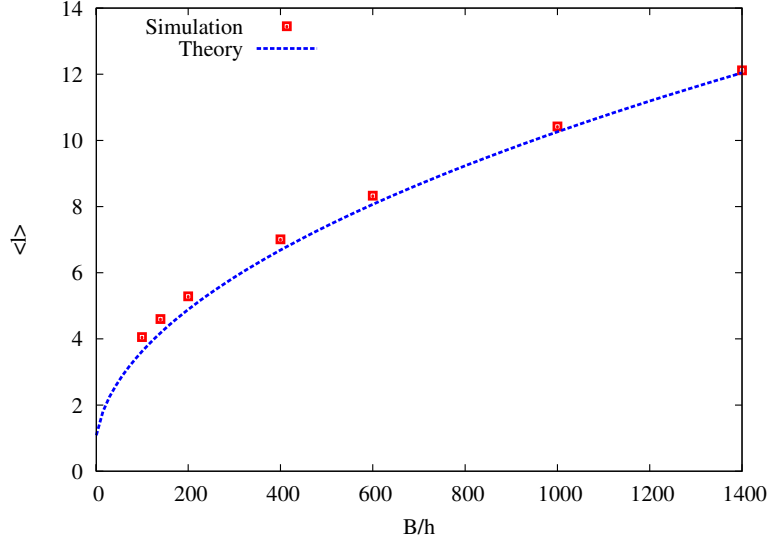

Supplementary Figure 6: The average length distribution for different concatenation rates (relative to hydrolysis) for a typically biased system ( $a = 0.05$ ). The analytic calculations agree well with the simulations.

#### 7.4. Size distribution with template-directed ligation

Rewriting the master equation (7) to include ligation gives

$$\begin{aligned}
 Bp(l) + (l-1)hp(l) &= \frac{1}{2} \sum_{i=1}^{l-1} Bp(i)p(l-i) + 2 \sum_{i=l+1}^{\infty} hp(i) \\
 &+ \sum_{i \geq l_a; j \geq 2l_a} c f_p p(i)p(j)(j-2l_a+1)p(l) \\
 &+ \frac{1}{2} \sum_{i=l_a}^{l-l_a} \sum_{j \geq 2l_a} c f_p p(i)p(l-i)p(j)(j-2l_a+1),
 \end{aligned}$$

where  $l_a$  denotes the annealing length. The inclusion of the sum from  $l_a$  to  $l-l_a$  in the sum from 1 to  $l-1$  yields a constant term, so the solution is no longer exponential. This explains the skew of the resulting distribution; presumably the solution to this master equation would determine the new distribution.

The length distribution in the presence of varying degrees of ligation is shown in Supplementary Figure 7).

## 8. Biased monomer abundance

When considering biased monomer abundance, template-directed ligation often increases  $C_k$ , but can also decrease  $C_k$  in some cases (Supplementary Figure 8). The  $C_k$  increase

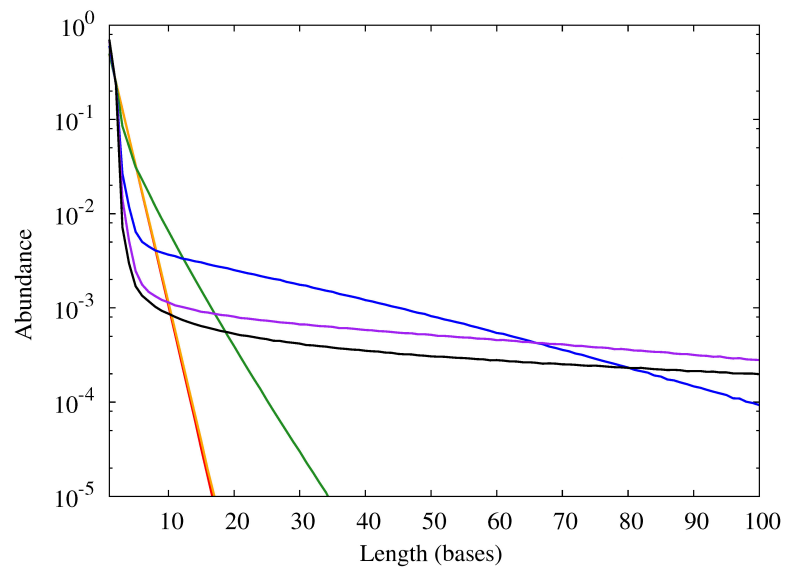

Supplementary Figure 7: Template-directed ligation increases average length and complexity. Length distribution of binary sequences for different rates of template-directed ligation ( $r_{lig} = 0$  (red),  $10^2$  (orange),  $10^3$  (green),  $10^4$  (blue),  $10^5$  (purple),  $10^6$  (black);  $r_{con} = 10$  in all cases).



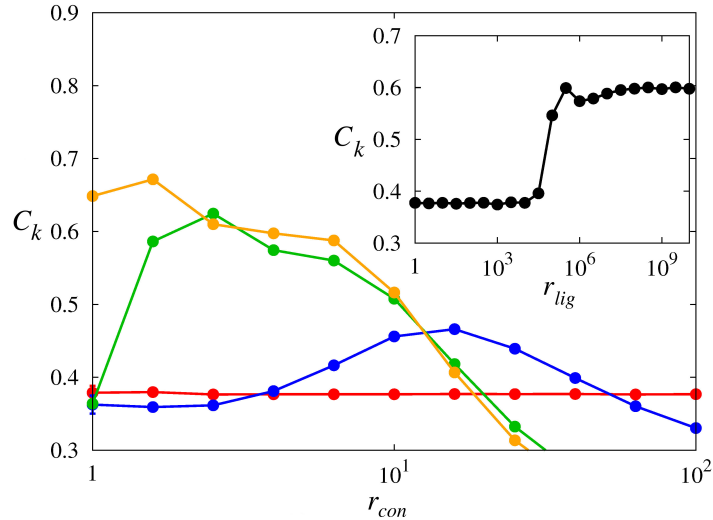

Supplementary Figure 8: Average  $C_3$  versus concatenation ratio  $r_{con}$  of sequences of length 15 when monomer abundance is biased (initial ratio = 1:9;  $k=3$ ), for  $r_{lig} = 0$  (red),  $2 \times 10^4$  (blue),  $10^6$  (green), or  $2 \times 10^8$  (orange). The inset shows  $C_3$  as a function of template-directed ligation ( $r_{con} = 4$ ).

is likely due to factors described in the main text. The decrease occurs in a limited regime but indicates the presence of some competing effects.

One possible explanation for the favoring of repetitive sequences at very high ligation rates is that they may be more robust to hydrolysis. A low  $C_k$  sequence (mostly 1s) would be in presence of a complementary equivalent (mostly 0s). In this extreme parameter range, ligation dominates, and when hydrolysis is low ( $k_{con}c_0/k_h \gg 1$ ), hydrolysis of one of these two polymers will be immediately repaired by template-directed ligation on the other. There are more ways for this to occur on a low  $C_k$  template, so this mechanism might therefore favor low  $C_k$  sequences.

The extent of this effect is apparently limited. As  $k_{con}c_0/k_h \rightarrow \infty$ , average  $C_k$  increases towards the same limit as for  $k_{lig} = 0$ , as the system essentially comprises one polymer. While these parameters may not be biochemically relevant, this additional phenomenon illustrates the complicated effects that occur within even a relatively simple model.

## 9. Concatenation increases compositional diversity: a mass-action effect

Here we present a simple model that gives us an analytical understanding of the effect that concatenation rates have on  $C_k$  of sequences of a given length. Our model consists of two types of monomers, **0** and **1**, and two types of dimers, **00** and **11**. (We later expand

this to include the heterodimers.) Monomers can be concatenated to form dimers, and dimers can be hydrolyzed into their constituent monomers:

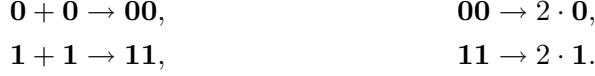

Concatenation of two  $\mathbf{0}$ 's to form the dimer  $\mathbf{00}$  occurs at rate  $a$ . Concatenation of two  $\mathbf{1}$ 's to form the dimer  $\mathbf{11}$  occurs at rate  $b$ . Both dimers are hydrolyzed at rate  $h$ . We assume that dimers are homogeneous in their constituents, but simulations suggest that relaxing this restriction does not affect the qualitative features we wish to establish with this model (see below).

We can formulate the chemistry described above with the following system of ordinary differential equations, where  $x_i$  is the abundance of sequence  $i$ :

$$\begin{aligned} \dot{x}_0 &= -2ax_0^2 + 2hx_{00} \\ \dot{x}_1 &= -2bx_1^2 + 2hx_{11} \\ \dot{x}_{00} &= ax_0^2 - hx_{00} \\ \dot{x}_{11} &= bx_1^2 - hx_{11} \\ 1 &= x_0 + 2x_{00} \\ 1 &= x_1 + 2x_{11} \end{aligned} \tag{20}$$

The last two equations guarantee that there are an equal number of  $\mathbf{0}$ 's and  $\mathbf{1}$ 's in the system.

At equilibrium,  $\dot{x}_0 = 0$ , so  $ax_0^{*2} = hx_{00}^*$ , where a  $*$  denotes a quantity's value at equilibrium. Letting  $a' = a/h$ , we have  $a'x_0^{*2} = x_{00}^*$ . Since

$$x_0 + 2x_{00} = 1, \tag{21}$$

we obtain the relation

$$x_0^* + 2a'x_0^{*2} = 1. \tag{22}$$

Solving this yields

$$x_0^* = \frac{\sqrt{8a' + 1} - 1}{4a'}. \tag{23}$$

Similarly, we have

$$x_1^* = \frac{\sqrt{8b' + 1} - 1}{4b'}. \tag{24}$$

Thus,

$$\begin{aligned} \frac{x_0^*}{x_1^*} &= \frac{b'(\sqrt{8a' + 1} - 1)}{a'(\sqrt{8b' + 1} - 1)} \\ &= \left(\frac{b'}{a'}\right) \frac{(\sqrt{8a' + 1} - 1)(\sqrt{8b' + 1} + 1)}{8b'} \\ &= \left(\frac{b'}{8a'}\right) \left( \sqrt{\frac{64a'b' + 8a' + 8b' + 1}{b'^2}} + \sqrt{\frac{8a' + 1}{b'^2}} - \sqrt{\frac{8b' + 1}{b'^2}} + \frac{1}{b'} \right). \end{aligned} \tag{25}$$

Now let  $a', b' \rightarrow \infty$  while keeping the ratio  $a'/b'$  fixed. Then from the expression above, we see that

$$\frac{x_0^*}{x_1^*} \rightarrow \sqrt{\frac{b'}{a'}}. \quad (26)$$

When  $b' > a'$ , concatenation of **1**'s is faster than concatenation of **0**'s. Thus, there should be fewer free **1** monomers than **0** monomers, making  $x_0^*/x_1^*$  large.

Since  $x_{00} = a'x_0^2$  and  $x_{11} = b'x_1^2$ , when  $a', b' \rightarrow \infty$  with  $a'/b'$  fixed, we have

$$\frac{x_{00}^*}{x_{11}^*} \rightarrow \frac{a'}{b'} \left( \frac{x_0^*}{x_1^*} \right)^2 = \frac{a'}{b'} \left( \sqrt{\frac{b'}{a'}} \right)^2 = 1. \quad (27)$$

We conclude that increasing the absolute concatenation rates drives the population of dimers towards an equal distribution of **00** and **11**. This is tantamount to saying that fast concatenation increases the population entropy of dimers. Indeed, the entropy of the population is maximized in the limit of infinitely fast concatenation.

Supplementary Figure 9(a) shows the percentage of monomers that have been incorporated into dimers at equilibrium as a function of the concatenation rate  $B/h$  when  $a = 0.2$  and  $b = 0.8$ . This bias in reactivity favors the polymerization of **1**'s. The percentage of **0**'s in dimers is in light blue and the percentage of **1**'s in dimers is in dark blue. The ratio of these two quantities is in red. When this ratio is very small ( $\ll 1$ ) or very large ( $\gg 1$ ), the population distribution is skewed towards the dimer **00** or the dimer **11**. When it is close to 1, there are a roughly equal number of **00**'s and **11**'s. As the figure shows, the ratio converges to 1 as  $B/h \rightarrow \infty$ .

Supplementary Figure 9(b) shows the analogous figure when the complete set of reactions is possible:

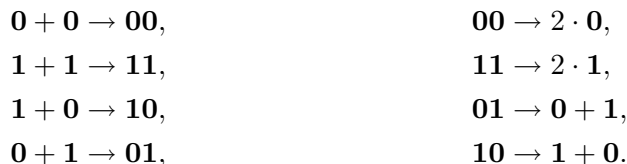

In this case, the key quantity approaches 1 in the limit of high  $B/h$  as well.

## 10. Compositional diversity and biased reactivity

When the reactivities of the two monomers differ, template-directed ligation increases compositional diversity (Supplementary Figure 10).

In order to check whether the effect of template directed ligation is just a mass action effect due to increased bond formation, we plotted (Supplementary Figure 11)  $C_k$  for different values of  $r_{\text{lig}}$ , as a function of the rate of bond forming events (template-directed ligation and concatenation). We observe that template-directed ligation still generally increases  $C_k$ , independently of its effect on bond formation rate, suggesting a more subtle cause (see main text).

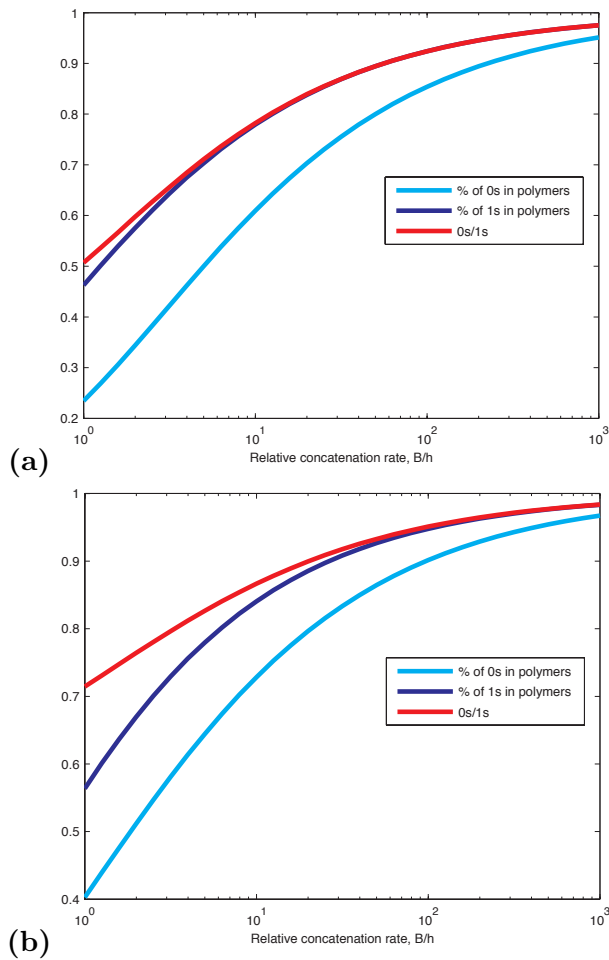

Supplementary Figure 9: The fraction of monomers that have been incorporated into dimers at equilibrium as a function of the concatenation rate  $B/h$  when  $a = 0.2$  and  $b = 0.8$ . This bias in reactivity favors the polymerization of 1's. The percentage of 0's in dimers is in light blue and the percentage of 1's in dimers is in dark blue. The ratio of these two quantities is in red. Results are shown for the simplified system (a) and the full system (b).

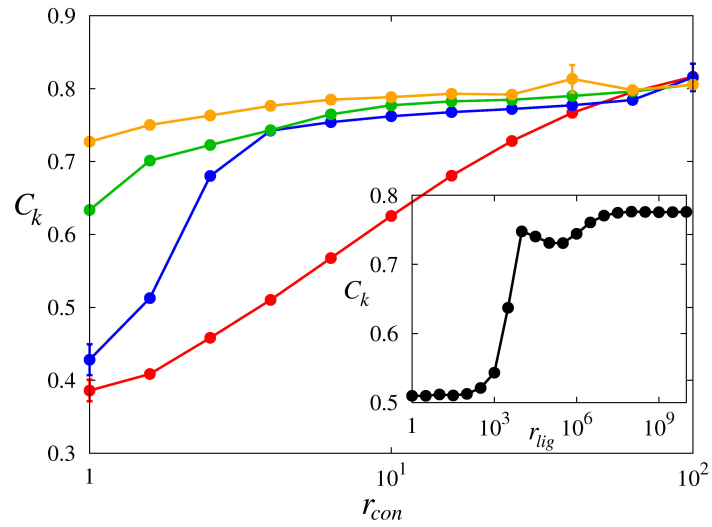

Supplementary Figure 10:  $C_3$  versus  $r_{con}$  when monomer reactivity is biased (19-fold difference between  $k_{con}$ ;  $r_{lig} = 0$  (red),  $2 \times 10^4$  (blue),  $10^6$  (green), or  $2 \times 10^8$  (orange);  $k=3$ , length = 15). The inset shows  $C_3$  as a function of template-directed ligation ( $r_{con} = 4$ ).

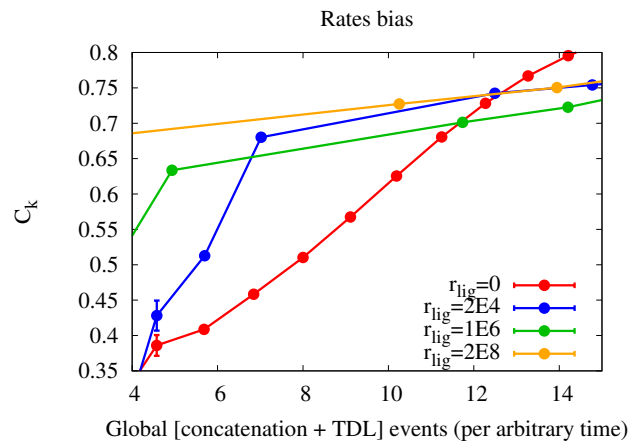

Supplementary Figure 11:  $C_3$  (length = 15) versus the total rate of bond-forming events, i.e., the sum of non-templated concatenation and template-directed ligation events.

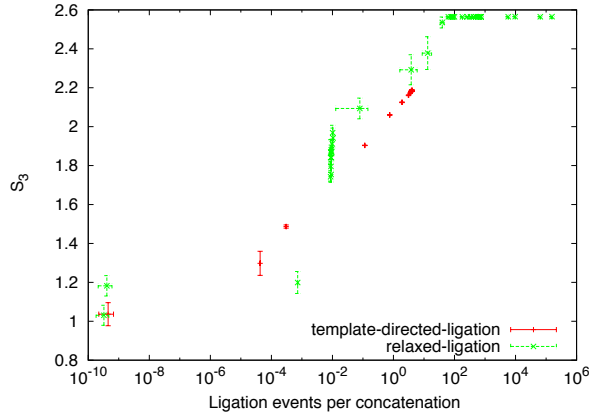

Supplementary Figure 12: Average entropy ( $S_3$ ) of 15-mers for systems with template-directed ligation (red) vs. relaxed-ligation (green), for simulation parameters giving a range of ratios for ligation events to concatenation events. Plotting the ratio of ligation events to concatenation events normalizes for the fact that relaxed-ligation produces many more ligation events overall compared to template-directed ligation.

## 11. Template-directed ligation counters intrinsic bias

One role of template-directed ligation is to introduce a relatively unbiased mode of concatenation into the system (Supplementary Figure 12).

## 12. Stochastic simulation using a 4-letter alphabet

There are significant computational difficulties with repeating our simulations using a 4-letter system. For the deterministic simulations, the total number of different sequences that the program can keep track of is limited by computational resources, since every possible reaction among these sequences is computed. This imposes a practical limit on the maximum length of sequences permitted in the system. For a 2-letter system, the practical limit is a length of 12. For a 4-letter system, the practical limit would be a length of 6. We do not feel that a simulation up to this length is of interest, since 6 is also the realistic minimum length for a sequence to act as a template. Results from such a simulation could be easily misinterpreted due to length limitation effects. In our 2-letter simulations, we ran both stochastic and deterministic simulations to increase our confidence in the results. For the 4-letter simulation, we were only able to run stochastic simulations. Nevertheless, with this caveat, the results are described in this section.

We analyze the compositional diversity analysis of stochastic simulations with a 4-letter alphabet at  $k = 1$  because the number of unique subsequences at  $k > 1$  (i.e.,  $4^k$ ) is larger than the number of subsequences analyzed per sequence for reasonable

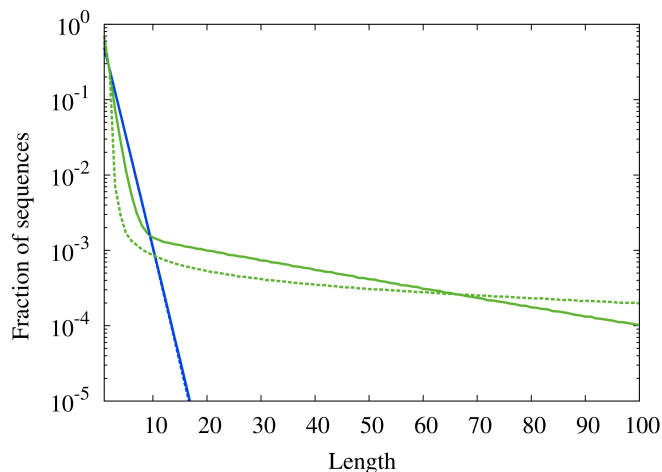

Supplementary Figure 13: Length distribution for a 4-letter stochastic simulation (solid lines), with or without template-directed ligation ( $r_{lig} = 0$  (blue) or  $10^6$  (green)). For comparison, the analogous results from a 2-letter simulation are shown in dotted lines (also shown in Figure 2a of the main text).

length. That is, we examine monomer composition of polymers of length 15 (longer polymers are rare, such that the number of simulations needed exceeds a reasonable computational capacity). The reactivity bias in the simulations was 19-fold (like Figure 2b of the main text), with two monomer types (e.g., the purines) reacting 10-fold faster than the other two monomer types (e.g., the pyrimidines). The length distribution is similar to the 2-letter case (Supplementary Figure 13). We observe a similar trend in compositional diversity, with template-directed ligation tending to increase  $C_1$ , although the effect is relatively small (Supplementary Figure 14). This is probably because the bias under study results in a relatively high compositional diversity even in the absence of template-directed ligation.

### 13. Why high $C_k$ templates are favored

The ratio  $R$  is always greater than 1 (Supplementary Figure 15).

### 14. Cumulative frequency distribution of $C_k$ for substrates and products of template-directed ligation (4 bases)

We found that the distribution of products of template-directed ligation was shifted toward higher  $C_k$  relative to the templates and octamer substrates. Supplementary Figure 16 shows the cumulative frequency distribution corresponding to the data described in Figure 3a of the main text. Note that the distribution of product sequences is shifted to the right. End-randomization did not affect this conclusion (Supplementary Figure 17).

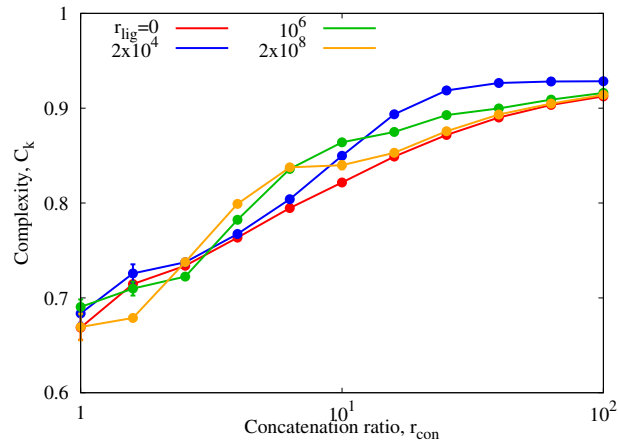

Supplementary Figure 14: Average  $C_k$  ( $k = 1$ ) for sequences of length 15 for a 4-letter stochastic simulation, over a range of concatenation ratio parameter values ( $r_{con}$ ), with varying levels of template-directed ligation ( $r_{lig} = 0$  (red),  $2 \times 10^4$  (blue),  $10^6$  (green),  $2 \times 10^8$  (yellow)).

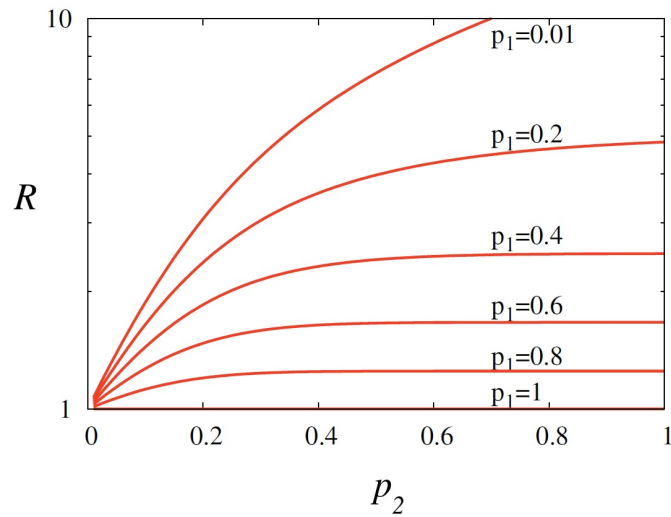

Supplementary Figure 15: Relative templating ability ( $R$ ) of high vs. low  $C_k$  templates, for different  $p_1$  and  $p_2$ .



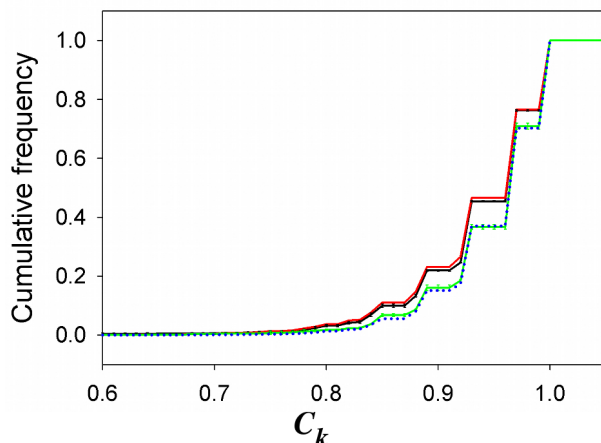

Supplementary Figure 16: Cumulative frequency distribution of average  $C_3$  (length = 16) of template-directed ligation in a heterogeneous pool demonstrates that sequenced products (green) have increased  $C_3$  relative to the templates (black = average  $C_3$  of 16-mers contained in sequenced 40-mer templates) and octamers (red =  $C_3$  of 16-mers from non-templated, random concatenation *in silico* from sequenced octamers), comparable to the distribution of a simulated completely random pool (dotted blue line). Error bars are standard deviations from replicate sequencing experiments.

A systematic shift in the GC content also did not explain the change in  $C_3$ . The overall GC fraction of the sequence reads from templates, octamers, and ligation products was 0.50, 0.56, and 0.53, respectively.

## 15. Search for ribozyme elements in the products of experimental template-directed ligation

We were interested in whether ribozyme sequence elements are more highly represented in the products of experimental template-directed ligation compared to the products predicted from template-independent, random ligation of octamer substrates. We generated  $10^6$  16-mer sequences *in silico* by combining octamer sequences randomly chosen from a pool of 23353 octamers (octamer sequences were obtained experimentally). We refer to this set of predicted products of template-independent ligation as  $\mathbf{P}$ . We also sequenced 707 16-mer products of template-directed ligation; we refer to this set of experimental products as  $\mathbf{E}$ . Because the number of known ribozyme motifs is small, and likely to be much smaller than the set of all possible ribozyme motifs, we cannot directly search  $\mathbf{P}$  and  $\mathbf{E}$  for ribozyme motifs. Instead, we chose to use a ribozyme of particular importance for the RNA world theory, an RNA polymerase ribozyme (198 nt) [65]. We treated this ribozyme as a set of small sequence elements, and searched  $\mathbf{P}$  and  $\mathbf{E}$  for these elements, to determine whether the elements of this ribozyme are more or less frequent in  $\mathbf{E}$  and  $\mathbf{P}$ . No obvious difference was seen (Supplementary Figure 18).

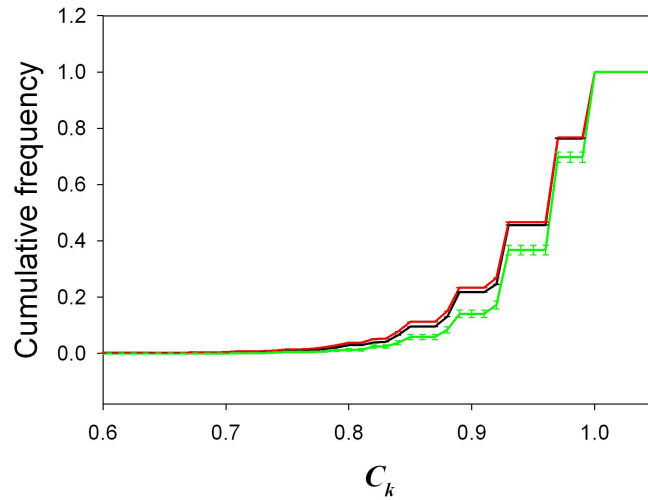

Supplementary Figure 17: Cumulative frequency distribution of  $C_3$  for templates, octamers, and products, after randomization of first and last base of each sequence read. Black = template sequences; red = simulated ‘products’ from sequenced octamers; green = ligation product sequences. Error bars are from bootstrapping.

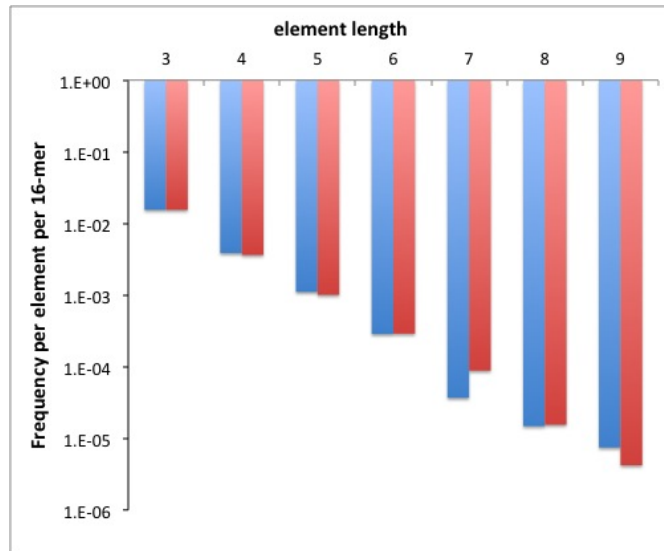

Supplementary Figure 18: Frequency of sequence elements from an RNA polymerase ribozyme [65] in the products of experimental template-directed ligation (red) or from simulated products of template-independent concatenation (blue). The frequency is the probability a particular sequence element was found in a given 16-mer, averaged over all elements.

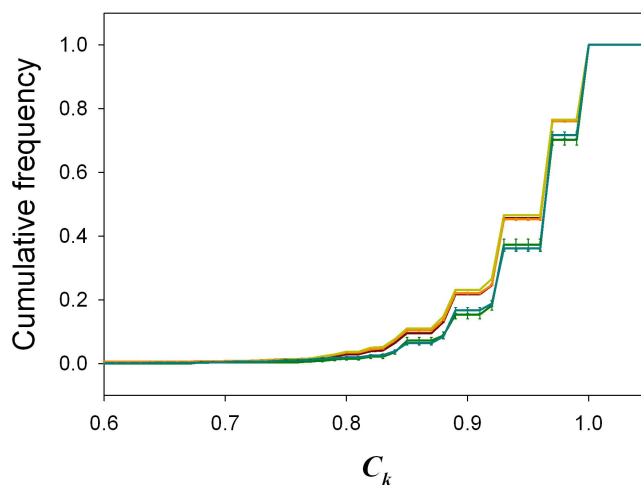

Supplementary Figure 19: Cumulative frequency distribution of  $C_3$  for templates, octamers, and products, showing inter-experiment differences and sampling error calculated by bootstrapping (error bars). Red and orange = template sequences from two experiments; yellow = simulated 'products' from sequenced octamers; green and blue = product sequences from two experiments.

## 16. Sampling error of sequencing (4 bases)

To calculate the sampling error from sequencing, 200 bootstrap samples were generated by randomly selecting  $n$  sequence reads (with replacement) from an experimental sample of  $n$  reads, and the compositional diversities were calculated for each sample. The sampling error is similar in magnitude to the error between experiments (Supplementary Figure 19).

## 17. Methods for experiments with binary templates

**Template-directed chemical ligation with a limited subset of oligonucleotides (2 bases).** We designed the following set of binary DNA templates and octamers such that a limited number (25, less than the theoretically possible set of  $2^8$ ) of octamers would be complementary to all 8mer subsequences within the entire set of templates, so that the availability of octamers would not be limiting. Ligation was performed with the following substrates. DNA oligonucleotides were obtained from Eurofins MWG Operon (Huntsville, AL) or Sigma-Aldrich (St. Louis, MO). For octamers, oligonucleotides were used without further purification. Template sequences were obtained in gel-purified form. Octamers were mixed in an equimolar mixture and phosphorylated by T4 polynucleotide kinase (New England Biolabs, Ipswich, MA) and  $[\gamma\text{-}^{32}\text{P}]\text{-ATP}$  at 37 degrees for 1 hour. 0.5 mM ATP was then added and the reaction was incubated overnight to ensure maximum phosphorylation. T4 PNK was inactivated by incubating at 65 degrees for 20





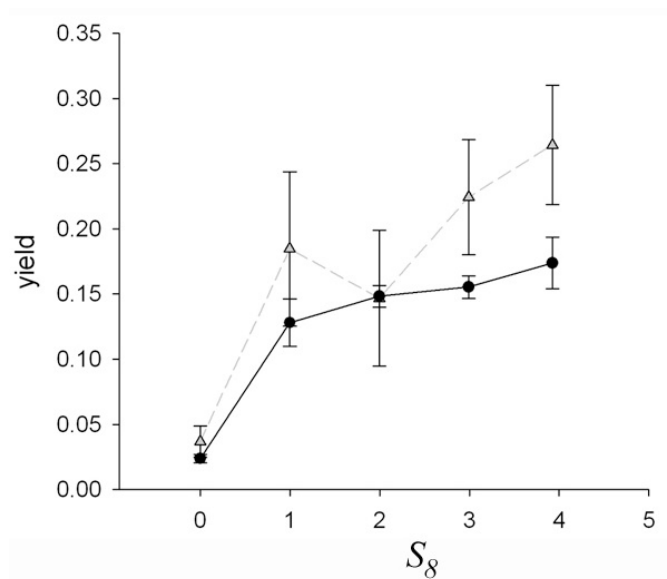

Supplementary Figure 20: Yield from template-directed ligation for a series of single templates of known  $C_k$  mixed with relatively high amounts of complementary fragments (32mer templates with subset of 25 possible octamers). Template concentration was  $1 \mu\text{M}$  (black) or  $2 \mu\text{M}$  (gray).

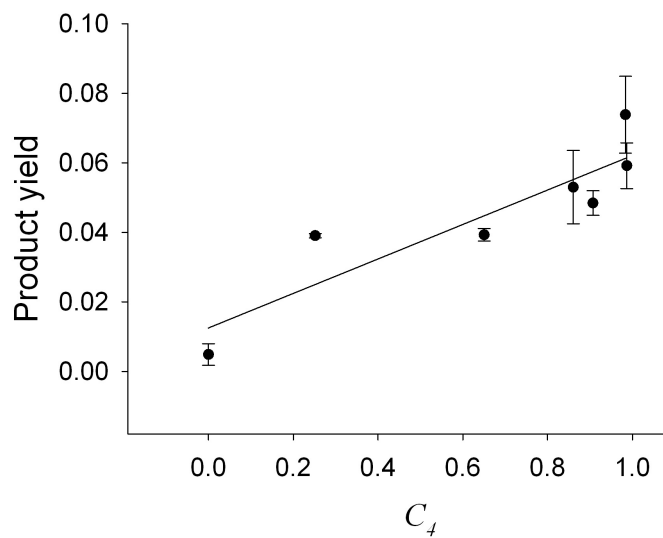

Supplementary Figure 21: Yield from template-directed ligation for a series of single templates of known  $C_k$  mixed with degenerate, random binary octamers (40mer templates).

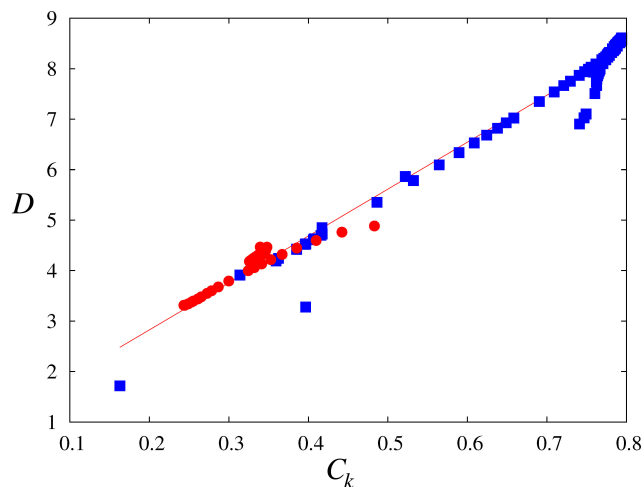

Supplementary Figure 22: Diversity vs. average  $C_3$  (length = 12) in deterministic simulations for  $r_{con}$  between 1 and 1000 and  $r_{lig}$  between 1 and  $10^7$  assuming bias in monomer abundance (red circles) or reactivity (blue squares). Solid line is a straight line of best fit to guide the eye (RMS deviation = 0.29).

| $\langle C_4 \rangle$ | std. dev. | $E_m$ (kcal/mol) | std. dev. |
|-----------------------|-----------|------------------|-----------|
| 0.6159                | 0.0142    | -0.0196          | 0.2031    |
| 0.6887                | 0.0196    | -0.0645          | 0.3601    |
| 0.7698                | 0.0259    | -0.5245          | 1.1704    |
| 0.8611                | 0.0255    | -2.0098          | 2.5140    |
| 0.9441                | 0.0250    | -5.7551          | 3.8876    |

Supplementary Figure 23: Mean and standard deviations of  $C_4$  vs. folding energy.

## 21. Folding energy and compositional diversity

In Figure 1 of the main text, sequences were binned according to  $C_k$ , with bin average and standard deviation as given below (Supplementary Figure 23). The average folding energy and standard deviation are also given.

## 22. Ribozymes analyzed for main text Figure 1b

The compositional diversity of the following ribozymes was determined. These ribozymes were chosen from the Ellington Lab Aptamer Database if they had a length in the range of 40-60 bases (in order to compare the *in silico* folding of 50-mers).

Piganeau N, Thuillier V, Famulok M. J Mol Biol. 2001 Oct 5;312(5):1177-90.

sequences:

AAGGCTAGACTGCTAAGAGCGGAGTACCGTCATTGGTGTC ; c3=0.93982586976 ;c4=0.989623852973  
AAGGCGAGACCGCTATGAGCGGAGTACCGTCATTGGTGTT ; c3=0.946069499894 ;c4=0.989623852973  
AAGGCGAGACCGCTTTGAGCGGAGTACCGTCATTGGTGTT ; c3=0.936040478187 ;c4=0.989623852973  
AAGGCAAGACCGCTATGAGCGGAGTACCGTCATTGGTGTT ; c3=0.959883913173 ;c4=0.989623852973  
AAGGCAAGACCGCTATGAGCGGAGTACCGTCATTGGTGTT ; c3=0.949854891467 ;c4=0.989623852973  
AAGGCCATACCTTTGACTGATAGTCTTTGAGTACCGTTGTC ; c3=0.882109978081 ;c4=0.968871558918  
CAGGCCATCTGGACTGATGTCTTGGTACCGTCGTC ; c3=0.902168021495 ;c4=0.979247705945  
GGAGAGGCCAGAGGGAATACGATAGTCCAGTACCGCGCTC ; c3=0.889609412919 ;c4=0.96991293488  
GGAGAGGCCAGAGGGAATCGATAGTCCAGTACCGCGCTC ; c3=0.909014577997 ;c4=0.96991293488  
GGAGAGGCCAGAGGGAATCGATAGTCCAGTACCGCGCTC ; c3=0.905953413067 ;c4=0.968871558918  
CAGGCTAGGCCCTATATATGATGCTGGGAGTACCGTCGTT ; c3=0.905953413067 ;c4=0.968871558918  
AAGGCGAGATGGCCCTAAGCAAGACTAAGTACCGTCATCT ; c3=0.919767826347 ;c4=0.979247705945  
GTAAGGCGAGACCATTCATGAGGAGTACCGTACAGCAGGC ; c3=0.889680761227 ;c4=0.968871558918  
GTGACACATTTGGCTTAATGTTGGGATAGTGCACCGGATAC ; c3=0.919767826347 ;c4=0.968871558918  
GTGACACATTTGGCTTAATGTTGGGATAGTGCACCGGATAC ; c3=0.919767826347 ;c4=0.968871558918  
GTGACACATTTGGCTTAATGTTGGGATAGTGCACCGGATAC ; c3=0.919767826347 ;c4=0.968871558918  
GTGACACATTTGGCTTAATGTTGGGATAGTGCACCGGATAC ; c3=0.919767826347 ;c4=0.968871558918  
ACCGCTGTACCTTACCGGTATAGGACAGGCCATACTGAGG ; c3=0.888353608215 ;c4=0.979247705945  
ACCGCTGTACCTTACCGGTATAGGACAGGCCATACTGAGG ; c3=0.878324586509 ;c4=0.979247705945  
GGAGAGCCACTTGA AAAACAAGGTCGGTTATGTTTAGT ; c3=0.90973880464 ;c4=0.964955147062  
GGAGAGCCACTTGA AAAACAAGGTCGGTTACGTTTAGT ; c3=0.899709782933 ;c4=0.954579000035  
GGATACTGTTGTGTGCGAAGCATGATCCGCATACGTTGGC ; c3=0.902168021495 ;c4=0.968871558918  
AAGAGCGCGACTGTAGAGGTCCTAACAGTGTGCGGACTC ; c3=0.915982434774 ;c4=0.979247705945  
CGGAGAGTGCCCCAGGATTTGGCAATCGTGTGAGGGTG ; c3=0.885895369654 ;c4=1.0  
CAGGCTGCAGATGCTCACTTTAACGTTGAGATTGGCCGTC ; c3=0.919767826347 ;c4=0.989623852973  
GGCACAGCCGCTGTGTCTATAACGCATATCTCTATGTC ; c3=0.855808304534 ;c4=0.944202853007  
ATTATACTACTTTCCACTTAGTGGAGAGCTCTGGTGAGATC ; c3=0.905953413067 ;c4=0.989623852973  
ACCGGCTGGTGGTACAATTTGGCAAGTGAAGCTAGAC ; c3=0.93982586976 ;c4=0.989623852973  
CGTGAGTGAGGGCTAACATGTGTCTAGCTACAGTATTTAC ; c3=0.882109978081 ;c4=0.968871558918  
ATTTGCGGTGTGACGGGGTCTTCGGTCCCGGTATAGTGC ; c3=0.855808304534 ;c4=0.954579000035  
GGACACAACCGTGACATTAATCTAAGTGGGATGTCGGCC ; c3=0.936040478187 ;c4=0.989623852973  
AAGTATGTCTGTGTTCTTGAACAATGATGACGCAGCTCT ; c3=0.904626260056 ;c4=0.989623852973  
TATGAAGGACACAGGGACGACGCTGTGATTACCCTTCGTC ; c3=0.949854891467 ;c4=1.0  
GGAGGACCCGCTCTGGCAAGGATTCATATTGCTGGCTT ; c3=0.895924391361 ;c4=0.968871558918  
ACTAGAGGGCGTGGACACGACGCTGTGATATTCGCCGCTGT ; c3=0.926011456481 ;c4=0.989623852973  
AGGCACGACCGCTGCTTCCGAGAGAAACCTGACGGTGCC ; c3=0.912197043201 ;c4=0.979247705945  
GGTTTAGCCCTGGCAAGCTTAGATATTGCTAGCTCTGTT ; c3=0.898382629922 ;c4=0.968871558918  
GTGTTGATACCTACGTCGTTGTTAGGCTGCGTGGACAC ; c3=0.892138999788 ;c4=0.979247705945  
TGTTGTATGAGCCAGGTATCTCTGGGTGCCTCAAATCGC ; c3=0.895924391361 ;c4=0.968871558918

average c4=0.976770986 for 39 sequences

Kawazoe N, Teramoto N, Ichinari H, Imanishi Y, Ito Y. Biomacromolecules. 2001 Fall;2(3):681-6.

sequences:

UGAACGAGGGCGGAUGUAGAACAGGGGUGGAAUGUUCGGGAUUUUCUG ; c3=0.856320541348 ;c4=0.960642913743  
AUUCGUCUGUUGUGGCGGAGGAGGGUGAGUAGGUGUGGUUGAAGUGGAUCG ; c3=0.817756532033 ;c4=0.944960509656  
UGGUUGGACUUCAGGGAAAGGUAAGCGGAGGACUCCUGAAUCUUAUGAUCGG ; c3=0.869258103766 ;c4=0.979259831248  
CUCUCUGUCUUCAGGUCAGGUUGGUCAGGUAACGAUGAGGAGCGAAU ; c3=0.857315065613 ;c4=0.949113258985

average c4=0.958494128 for 4 sequences

Mobley EM, Pan T. Nucleic Acids Res. 1999 Nov 1;27(21):4298-304.

sequences:

AAAACAACUGAUCGAACGUCACGGUCGCGCCACCCAGCUCUUCACUGCCCCCCC ; c3=0.842162919035 ;c4=0.940592840387  
AGUCUUAUCGCGUACACAACGGUAUGACUGGCCCGUGCCACCCCCC ; c3=0.811085996467 ;c4=0.904313426265  
AUAUCGAGACUCCAAAUGUUUCUGGUGACGGGUCUCUUAACUCAGUCCACCUCCUCUG ; c3=0.869425036475 ;c4=0.969922526215  
GACAUACCACAGACACAUUGUAGUGGCUAGAGUGGCAAAUGACUUCAGUCCAGGUC ; c3=0.87338361458 ;c4=0.963907031458  
ACACACCCUCUGGGUUGGAGCUCUAGCCACUCGGAACUCUUCACUCGUUUUCGUC ; c3=0.826291951225 ;c4=0.93984505243  
AGUCGCAUCCUGGACUUGGGCCGUCUUGGACUGCGACCAGACCAUCGUCAGCUUGAUG ; c3=0.853208507121 ;c4=0.93984505243

average c4=0.943070988 for 6 sequences

Li J, Zheng W, Kwon AH, Lu Y. Nucleic Acids Res. 2000 Jan 15;28(2):481-8.

sequences:

TTTTGTCAGCGACTCGAAATAGTGTGTTGAAGCAGCTCTA ; c3=0.882109978081 ;c4=0.979247705945



TTAGTTCTACCAGCGGTTTCGAAATAGTGAAATGTTTCGTGA ; c3=0.872080956375 ;c4=0.923450558953  
CAAAGATGCCAGCATGCTATTCTCCGAGCCGGTCCGAAATA ; c3=0.929796848053 ;c4=0.989623852973  
CAAAGATGCCTGCATGCTATTCTCCGAGCCGGTCCGAAATA ; c3=0.926011456481 ;c4=0.989623852973  
GTCTCCGAGCCGGTCCGAAATAGTCAGGTGTTTCTATTTCGG ; c3=0.905953413067 ;c4=1.0  
CTTCTCCGAGCCGGTCCGAAATAGTAGTTTTTATGATATCT ; c3=0.868295564802 ;c4=0.954579000035  
AGGTGTTGGCTGCTCTCGCGTGGCGAGAGGTAGGGTGAT ; c3=0.852022912961 ;c4=0.954579000035

average c4=0.97015771 for 7 sequences

Roth A, Breaker RR. Proc Natl Acad Sci U S A. 1998 May 26;95(11):6027-31.

sequences:  
CGGGTCGAGGTGGGAAAACAGGCAAGGCTGTTTCAGGATG ; c3=0.885895369654 ;c4=0.979247705945  
AGGATTAAGCCGAATTCCAGCACACTGGCGGCCGCTTCAC ; c3=0.915982434774 ;c4=0.989623852973

average c4=0.984435779 for 2 sequences

Tang J, Breaker RR. Proc Natl Acad Sci U S A. 2000 May 23;97(11):5784-9.

sequences:  
AUGCAAUGCAUUUGAGAACUGUAAGUUGUAUGAGGGCAUG ; c3=0.865837326241 ;c4=0.948119264863  
AUGUGAUGCAUUUGAGAACUGCAAGUUGUAUGAGGGCAUG ; c3=0.862051934668 ;c4=0.968871558918  
UUGCAAUGCCUUUGAGAACUGAAAGUUGUAUUAGGGGAGUG ; c3=0.926011456481 ;c4=1.0  
AUGCAUUGCGUUUGAGAACUGGAAGUUGAAUGAGGGCAUG ; c3=0.854481151523 ;c4=0.968871558918  
GUGCAAUGCAUUUGAGAACUGUGAGUUGUAUUAGGUCAUG ; c3=0.899709782933 ;c4=0.979247705945  
AUGUAAUGCAUUUGAGAACUGAAAGUUGUAUUAGGGCAUG ; c3=0.915982434774 ;c4=0.979247705945  
AUGCAAUUGCAUUUGAGAACUGUAAGUUGUAUCAGGGCAUG ; c3=0.929796848053 ;c4=1.0  
AUGCGAGGCAUUUGAGAACUUAAGUUGUAUGAGGGCAUG ; c3=0.892138999788 ;c4=0.95849541189  
AUGCAUUGCACUUGAGAGCUGAAAGCUGGAUGAGGGCAGG ; c3=0.858266543095 ;c4=0.95849541189  
GUGCAAUGCAUUUGAGAACUGGAAGUUGUAUUAGGGCAUA ; c3=0.926011456481 ;c4=0.979247705945  
AUGCUAUGCAUUUGAGAACUGAGAGUUGUAUGGGGGCACG ; c3=0.868295564802 ;c4=0.948119264863  
AUGCAGUGCGUUUGAGAACUGUAAGUUGUAUCAGGGCAGG ; c3=0.895924391361 ;c4=0.968871558918  
GUGCAAUGCAUUUGAGAACUGAAAGUUGUAUUAGGGUAGUG ; c3=0.90973880464 ;c4=0.979247705945  
GGCGAUAGGUGAGUACACUGGGUCGGAGGGGAUAGCUAGGU ; c3=0.878324586509 ;c4=0.95849541189  
GGCGUAUAGGUGAGCACACUGGGUCGGAGGGCUAGCUAGGU ; c3=0.899709782933 ;c4=0.979247705945  
GGCGAUAGGUGAGUACCGUCGGUCGGAGGGGAUAGCUAGGC ; c3=0.872080956375 ;c4=0.968871558918  
GGCGUAUAGGUGAGUACACUGGGUCGGAGGGGAUAGCUAGGA ; c3=0.905953413067 ;c4=0.989623852973  
GGCGAUAGGUGAGUACACUGGGUCGGAGGGACGGCUAGGC ; c3=0.892138999788 ;c4=0.989623852973  
GGCGUAUAGGUGAGUACACUGGGUCGGAGGGGAUAGCUAGGU ; c3=0.90973880464 ;c4=0.989623852973  
GGCGUAUAGGUGAGUACACUGGGUCGGAGGGGAUAGGGAGGU ; c3=0.848237521389 ;c4=0.927366970808  
GGCGAUAGGUGAAUACACUGGGUCGGAGGGGAUAGCUAACA ; c3=0.905953413067 ;c4=0.979247705945  
GGCGAUAGGUGAGUACACUGGGUCGGAGGGGAUUCGAGGU ; c3=0.868295564802 ;c4=0.968871558918  
GGCGAUAGGUGAGUACACUGGGUCGGAGGGGAUUGCUAGUC ; c3=0.872080956375 ;c4=0.968871558918  
GGCGUAUAGGUGAGAAACACUGCGUCGGAGGGGAUAGCUAGGU ; c3=0.93982586976 ;c4=1.0  
GGCGAUAGGUGUUUACACUGGGUCGGAGGGGAUAGCUAAGC ; c3=0.929796848053 ;c4=0.989623852973  
GGCGAUAGGUGAGUACACUGGGUCGGAGGGGAUAGGAAGAU ; c3=0.878324586509 ;c4=0.979247705945

average c4=0.974059632 for 26 sequences

Jadhav VR, Yarus M. Biochemistry. 2002 Jan 22;41(3):723-9.

sequences:  
AUUCGUCGAGGAGCUCACCAGGACUUAUUAAGUGCCAGUCGCGCCUUC ; c3=0.888092355156 ;c4=0.969356369931  
AUUCGUCGAGGAGCUCACCAGGGCUUAUUAAGUGCCAGUCGCGCCUUC ; c3=0.885276432406 ;c4=0.969356369931  
UAUUUCGUCGAGGACCAUAGCAUGUCGUAAAACAUAAGCAAGGCGCUUC ; c3=0.907657961375 ;c4=0.977017277448  
CUCGUCGAGGAACGAUGCAUCGAAACUAAGUUAAGCAUUCGUCGCUUC ; c3=0.860078980687 ;c4=0.938712739862  
AGAGAUCGUCGAGGACAGUUGUAUACAGAGUAGCAGCUCGCGCUUC ; c3=0.902285986452 ;c4=0.992128582749  
AGAGAUCGUCGAGGACAGUUGUAUACAGAGUAGCAGCUCGCGCUUC ; c3=0.894625078935 ;c4=0.984257165497  
ACUGGCAUAACUCUUUGGGAUGUGCGUCAGACCAGGUGUACCGCCAGC ; c3=0.917934393781 ;c4=0.984678184965  
AAUAAAGGCAUUGGACAUUCCAUCAGGAAAGCCCGUCGCGCCUUCUUC ; c3=0.87218407725 ;c4=0.992339092483  
AAAGAAAAUUAAGACAGGGCUGGAGGAAUUAUCCUGGAACUCUUUGCC ; c3=0.897381528969 ;c4=0.969356369931  
UCCGGAUUGCAUAGACCUGCUCUAGGGCUAAACCCAAUUUUAGCUCGCG ; c3=0.91283845564 ;c4=0.984257165497  
UCAGUGAAAGUACUCUCAAUUGUGAUCGAGGCAUUGUUUUAUAGCAGGC ; c3=0.900197451719 ;c4=0.977017277448  
ACAGAUACUCAAACGAUAGUCUUAAGCAUUGGAACUUUAUACUCCG ; c3=0.874533918053 ;c4=0.968514330995  
GUACGCAUCAGAAAAUGAAGAAACUCCGUAUGGGGCAUUAUCUGC ; c3=0.887105096563 ;c4=0.984678184965  
UCAGCCCCAUUACAUGCAUUGGCAAAUACUUAUGAGGGUCUUUAAGUCGUG ; c3=0.938712739862 ;c4=1.0  
AAUACUAAUAGCGUUUCGUAUGGAGGAUUAUCAGAAUACUAGCUUC ; c3=0.897381528969 ;c4=0.969356369931  
GAAAAUAAACCAUUCUCCAGAAUGCAUUCAGGGCUCUUAACAUUUGG ; c3=0.894565606219 ;c4=0.984678184965

average c4=0.977856479 for 16 sequences

Beaudry A, DeFoe J, Zinnen S, Burgin A, Beigelman L. Chem Biol. 2000 May;7(5):323-34.

sequences:  
GGUGUCAUCAUAAUGGCACCCUUAAGGACAUCGUCCGGG ; c3=0.932255086615 ;c4=0.979247705945  
GGAGUCAUCAUAAUGGCUCUCCUUAAGGACAUCGUCCGGG ; c3=0.912197043201 ;c4=0.979247705945  
GGUGUCAUCAUAAUGGCACCCUUAAGGACAUCGUCCGGG ; c3=0.932255086615 ;c4=0.979247705945  
GGAGUCAUCAUAAUGGCUCUCCUUAAGGACAUCGUCCGGG ; c3=0.936040478187 ;c4=0.989623852973  
GGUGUCAUCAUAAUGGCACCCUUAAGGACAUCGUCCGGG ; c3=0.912197043201 ;c4=0.968871558918

| Cumulative variance explained (%): |        |        |        |        |        |        |        |        |        |         |
|------------------------------------|--------|--------|--------|--------|--------|--------|--------|--------|--------|---------|
|                                    | Comp 1 | Comp 2 | Comp 3 | Comp 4 | Comp 5 | Comp 6 | Comp 7 | Comp 8 | Comp 9 | Comp 10 |
| <b>Em</b>                          | 54.78  | 59.45  | 60.29  | 60.64  | 60.84  | 60.91  | 61.13  | 61.19  | 61.21  | 61.21   |

  

| Percentage contributions to components: |        |        |        |        |        |        |        |        |        |         |
|-----------------------------------------|--------|--------|--------|--------|--------|--------|--------|--------|--------|---------|
|                                         | Comp 1 | Comp 2 | Comp 3 | Comp 4 | Comp 5 | Comp 6 | Comp 7 | Comp 8 | Comp 9 | Comp 10 |
| <b>C4</b>                               | -0.141 | 0.034  | 0.001  | -0.009 | 0.036  | -0.016 | 0.219  | -0.122 | 0.364  | 0.057   |
| <b>C5</b>                               | -0.140 | 0.004  | 0.035  | -0.100 | 0.131  | -0.039 | 0.079  | -0.393 | -0.077 | -0.003  |
| <b>C3</b>                               | -0.139 | 0.061  | 0.026  | -0.007 | 0.001  | 0.000  | -0.024 | 0.217  | -0.213 | 0.314   |
| <b>C2</b>                               | -0.136 | 0.073  | 0.049  | 0.032  | -0.026 | 0.007  | -0.030 | 0.000  | 0.139  | -0.508  |
| <b>C1</b>                               | -0.134 | 0.078  | -0.059 | 0.047  | -0.048 | 0.015  | -0.119 | -0.180 | -0.204 | 0.117   |
| <b>C6</b>                               | -0.130 | -0.020 | -0.179 | 0.138  | -0.023 | 0.000  | 0.420  | 0.085  | 0.004  | 0.000   |
| <b>C7</b>                               | -0.100 | -0.149 | -0.191 | -0.009 | 0.320  | -0.126 | -0.103 | -0.003 | 0.000  | 0.000   |
| <b>C8</b>                               | -0.055 | -0.290 | 0.003  | -0.378 | -0.050 | 0.219  | 0.006  | 0.000  | 0.000  | 0.000   |
| <b>C9</b>                               | -0.020 | -0.215 | 0.264  | 0.033  | -0.120 | -0.347 | 0.000  | 0.000  | 0.000  | 0.000   |
| <b>C10</b>                              | -0.006 | -0.077 | 0.193  | 0.247  | 0.247  | 0.231  | 0.000  | 0.000  | 0.000  | 0.000   |

Supplementary Figure 24: Principal components regression of  $C_k$  and  $E_m$ .

```

GGAGUCAUCACAAUAGGCUCCCUUCAAGGACAUUCGUCGGG ; c3=0.905953413067 ;c4=0.989623852973
GGAGACAUCAUAAUAGGCUCCCUUCAAGGACAUUCGUCGGG ; c3=0.915982434774 ;c4=0.95849541189
GGAGUCAUAUUGGCUCCCUUCAAGGACAUUCGUCGGG ; c3=0.892138999788 ;c4=0.95849541189
GGUGCCACCAUAAUAGGCACCCUUCAAGGACAUUCGUCGGG ; c3=0.959883913173 ;c4=0.989623852973
GGAGUCAUCAUAAUAGGCUCCCUUCAAGGACAUUCGUCGGG ; c3=0.902168021495 ;c4=0.979247705945
GGAGUCAUCAUAAUAGGCACCCUUCAAGGACAUUCGUCGGG ; c3=0.922226064908 ;c4=0.979247705945
GGUGUCAUCAUAAUAGGACACCAUUCAAGGACAUUCGUCGGG ; c3=0.895924391361 ;c4=0.968871558918
GGUGUCAUCAUAAUAGGCACCCUUCAAGGACAUUCGUCGGG ; c3=0.902168021495 ;c4=0.968871558918
GGUGUCAUCUAAUAGGCACCCUUCAAGGACAUUCGUCGGG ; c3=0.949854891467 ;c4=0.989623852973
GGAGCCGUCAUAAUAGGCUCCCUUCAAGGACAUUCGUCGGG ; c3=0.929796848053 ;c4=0.989623852973
GGAGCCACCAUAAUAGGCACCCUUCAAGGACAUUCGUCGGG ; c3=0.959883913173 ;c4=1.0
GGAGUCAUCAUAAUAGGCUCCCUUCAAGGACAUUCGUCGGG ; c3=0.882109978081 ;c4=0.954579000035
GGAGUCAUCAUAAUAGGCUCCCUUCAAGGACAUUCGUCGGG ; c3=0.902168021495 ;c4=0.979247705945
GGAGUCACCAUAAUAGGCUCCCUUCAAGGACAUUCGUCGGG ; c3=0.949854891467 ;c4=1.0
GGUGUCACCAUAAUAGGCACCCUUCAAGGACAUUCGUCGGG ; c3=0.93982586976 ;c4=0.989623852973
GGUGUCAACAUAAUAGGACACCCUUCAAGGACAUUCGUCGGG ; c3=0.926011456481 ;c4=0.968871558918
GGAGUCACCAUAAUAGGACACCCUUCAAGGACAUUCGUCGGG ; c3=0.93982586976 ;c4=1.0
GGUGUCAUCAUAAUAGGCACCCUUCAAGGACAUUCGUCGGG ; c3=0.922226064908 ;c4=0.979247705945
GGAGUCACCAUAAUAGGCUCCCUUCAAGGACAUUCGUCGGG ; c3=0.949854891467 ;c4=1.0
GGUGUCAUCAUAAUAGGCUCCCUUCAAGGACAUUCGUCGGG ; c3=0.922226064908 ;c4=0.979247705945
GGUGUCAUCGUAUAGGCACCCUUCAAGGACAUUCGUCGGG ; c3=0.93982586976 ;c4=0.968871558918
GGAGUCAUCAUAAUAGGACACCCUUCAAGGACAUUCGUCGGG ; c3=0.902168021495 ;c4=0.979247705945
GGUGUCAUCAUAAUAGGCACCCUUCAAGGACAUUCGUCGGG ; c3=0.902168021495 ;c4=0.954579000035
GGAGUCAUCAUAAUAGGCUCCCUUCAAGGACAUUCGUCGGG ; c3=0.902168021495 ;c4=0.954579000035
GGAGUCAUCAUAAUAGGCUCCCUUCAAGGACAUUCGUCGGG ; c3=0.892138999788 ;c4=0.979247705945
GGUGUCAUCAUAAUAGGCACCCUUCAAGGACAUUCGUCGGG ; c3=0.922226064908 ;c4=0.979247705945

```

average c4=0.978533984 for 31 sequences

## 23. Compositional diversity and folding energy: principal components regression

Nonparametric principal component regression [81] was carried out on ranked data using the R [83] package "pls" [86] (Supplementary Figure 24).

## 24. References

See main text for references 75-86 cited in the supplementary information.
